# Supplementary material
Source: publisher figshare collection journal article supplement (https://sage.figshare.com/ndownloader/files/15460214)
Supplement: Supplementary file 1 [file 15460214]

## Appendix A. Extracts

### Extract one

- 9 E: so Japan (.) Japan's (.) <um> (.) what do you あの日本(.)日本の(.)<えーと> (.)
- 10 think about Japan's leadership (.) um (.) the リーダーシップについてどういふうに考えてるん
- 11 founder= ですかあの (.) 創健者の =
- 12 D: =ahem= =ごほん =
- 13 E: =wait a minute= =ちょっと待って =
- 14 D: =Japan's leadership ha= =日本のリーダーシップって =
- 15 E: =Japan's (.) yeah (.) sorry (.) I'm sorry for =日本の(.)うん(.)ごめんなさい(.)途中
- 16 starting in the middle (.) so (.) she has でもおしわけ(.)あの(.)彼女がですね
- 17 <um> shown me the founder's book <あの> 創健者の本を見せたんですよ
- 18 D: yes right うんうん
- 19 E: in the founder's book it is written that (.) <um> 創健者の本の中で (.) <えーと>
- 20 in regards to their superiors Japanese people 日本人はですね上司に対して
- 21 really(.) ob (.) obey them (.) which is a すごく(.)ふく(.)服従する(.)美徳があると書
- 22 virtue (.) in relation to that how do you (.) いてあるんですねそれに関してどういふうに(.)

- 23 understand it 理解しているか
- 24 ((Talk between Emi and the field researcher in  
- Chinese, not analyzed for reason of space))
- 31
- 32 E: this (.) this (.) what are your thoughts on that この(.)この(.)観点についてどういふうに
- 33 point of view (.) what do you think about it えーと(.)お考えご考えですか

### Extract two

- 34 D: <the question is> (.) uh (.) that point of view is <質問は> (.) え (.) その観点
- 35 what point of view exactly ってどの観点
- 36 E: <um> absolute obedience in regards to superiors <あのー> 上司に対して絶対的に服従する
- 37 is a virtue (.) the founder said ことは美德だと (.) 創健者がおしゃってる
- 38 (2) (2)
- 39 E he did= ですよ=
- 40 D: =the founder said that =創健者が言ってんだ
- 41 where どこだよ

### Extract three

- 59 E: =absolute obedience in regards to superiors = 上司に対して絶対的な服従
- 60 (2) (2)
- 61 E: occurs をする
- 62 (3) (3)
- 63 E: and that sort of (.) virtue (.) exists ような (.) 美徳が (.) あるんです
- 64 D: <um> Japanese people when it comes to <あのー> 日本人は上司のいうことは
- 65 what their boss says um (.) they will listen あの (.) 何でも聞くっていう (.)
- 66 to everything and anything (.) that's= そういう=
- 67 E: =that's right isn't it = あそうそうですね
- 68 D: even things outside of work 仕事以外のことでもとかさ
- 69 E: that's true そうです

## Extract four

### 4a.

- 70 D: <um in relation to work> so (.) Western people <あのー仕事に関して> あの (.) 上司に
- 71 are more likely to obey their superiors absolutely (.) 絶対服従とか欧米人のほうが (.)
- 72 <more likely> to obey you know↑ <よくあの> 服従だよ↑

**4b.**

- 78 D: in relation to business (.) see here↑ ビジネスに関しては (.) なちよっとね ↑
- 79 meaning is different okay↑ (.) I don't know the context 意味が違うとね ↑ (.) 前後はわかんないけど
- 80 which book and which bit I don't know so そのどこのどの本でどのふんでわかんないから
- 81 see I don't know the context so ちょっとね前後がわかんないから

**Extract five**

**5a.**

- 101 E: what she wants to ask is (.) Japanese people (.) 聞きたいのは (.) 日本人 (.)
- 102 their leadership (.) how do you see it (.) のリーダーシップ(.)についてどうゆうふうに(.)
- 103 what are your thoughts かんがえてるんですね

**5b.**

- 110 D: =so the founder's (.) so in the founder's time =あの創業者の(.)あのね創業者のころ
- 111 in other words so Honda's (.) Mr. Soichiro Honda ↑ つまりあのホンダの(.)本田宗一郎さんとかね ↑
- 112 in the founding period (.) that is to say <um> え創業期 (.) いわゆる<あの>
- 113 Mr. Soichiro Honda during the founding period (.) 創業期の本田宗一郎さんとか (.)
- 114 his so called (.) そう言った (.)

|     |                                                          |                                         |
|-----|----------------------------------------------------------|-----------------------------------------|
| 115 | <um> Japanese leadership                                 | <あの> 日本人のリーダーシップというのはこれは                |
| 116 | he had a certain <u>charisma</u> to him↑                 | あの <u>カリスマ性</u> ね↑                      |
| 117 | (5)                                                      | (5)                                     |
| 118 | D: charisma charisma (.) it's not a Japanese word        | カリスマカリスマって(.)あの(.)日本語じゃなくて              |
| 119 | <um so> it might be from Latin                           | <えーとね> ラテン語からかもね                        |
| 120 | E: charisma (.) I've heard of it but can't remember      | カリスマ(.)我听到过但忘记了                         |
| 121 | D: <so charisma> (.) oh well doesn't matter              | <カリスマ性とねまー> (.) まあいいや                   |
| 122 | <so um> (.) the only (.) <uh> (.) well                   | <そういったあの> (.) 唯一 (.) <えー> (.) まあ        |
| 123 | <uh> so because he was the only leader that              | <あー> それこそ <u>太陽</u> みたいなリーダーシップ         |
| 124 | meant he was seriously like the <u>sun</u> (.) but       | ということで非常に ありました(.)しかし                   |
| 125 | <u>nowadays</u> leadership <u>is</u> (.) an organization | <u>現在の</u> リーダーシップ <u>というの</u> は(.)あの組織 |
| 126 | <uh> according to one person one president or            | <えー> 一人の一人のあの社長とか一人のトップ                 |
| 127 | one boss(.) <um> that person decides everything          | によって (.) <あの> すべてを決めるとか                 |
| 128 | <um> either <u>that person</u> decides everything        | <あの> <u>その人</u> がすべてを決めるのか              |
| 129 | or from <u>that person</u> controlling the whole         | <u>その人</u> が全体を動かすということで組織で             |
| 130 | it's become that the organization has the control (.)    | 動かすことになってるから(.)                         |
| 131 | <uh> the Japanese people                                 | <えー> 1960 年代                            |

|     |                                                  |                          |
|-----|--------------------------------------------------|--------------------------|
| 132 | from the sixties and seventies and from today    | 70 年代と今の日本人の(.) <え> リーダー |
| 133 | <so> their leadership is (.) it's clearly become | シップというのは(.) 明らかに違ってるという  |
| 134 | something different or so I (.) understand it    | ふうにかわっていきてるふうには(.) 理解してる |

## Extract six

### 6a.

|     |                                                     |                           |
|-----|-----------------------------------------------------|---------------------------|
| 147 | E: <um> (.) so the employees (.) are the ones that  | <あの> (.) あの従業員は (.) あの仕事  |
| 148 | do the work he seems to think he said (.)           | やるものだと考えていらしたんです (.)      |
| 149 | in Japan (.) <um> (.) <um> the                      | 日本では (.) <え-と> (.) <え-と>  |
| 150 | employees have no power to make decisions           | 従業員はですね命令はない              |
| 151 | (5)                                                 | (5)                       |
| 152 | <um> (.) they have no right to give orders          | <え-と> (.) 命令権はないです        |
| 153 | ((reading)) if each person wants to give advice and | ((読書)) 各人は忠告と指導           |
| 154 | directions <um> (.) if they all want that (.) <um>  | を<え-と> (.) 求めて (.) <え-と>  |
| 155 | (3)                                                 | (3)                       |
| 156 | it's a problem (.) <um> (.) who to follow           | 困りですね (.) <え-と> (.) つまぬくか |
| 157 | no one knows (.) it's difficult                     | 分からない(.)これは難しいですね         |

|     |                                                       |                            |
|-----|-------------------------------------------------------|----------------------------|
| 158 | um (.) sorry                                          | あの (.) ごめんなさい              |
| 159 | so if each person gives                               | あの各人の忠告と指導を                |
| 160 | <um> advice and directions                            | <えーと>してもですね                |
| 161 | how far (.) <um> how thoroughly                       | どこまで (.) <えーと>徹底           |
| 162 | can they be followed (.) so (.) we can't say          | できるかですね(.)その(.)まあ言えない      |
| 163 | (4)                                                   | (4)                        |
| 164 | D: then after that                                    | でそのあと                      |
| 165 | E: how far (.) <um> right Japanese people             | どこまで (.) <えーと>そうですね日本人は    |
| 166 | in regards to their boss (.) their absolute obedience | 上司に対して (.) 絶対的に服従する        |
| 167 | <u>that sort of</u>                                   | <u>ような</u>                 |
| 168 | <u>something like that</u> (.) <um> it's a virtue     | <u>みたいな</u> (.) <えーと>美德ですね |
| 169 | well it is (.) why that is <um>                       | まーあるんです(.)あのなぜかというとかれらは    |
| 170 | <u>if</u> they don't listen to the person in charge   | <えーと> 責任者の話を聞かないと <u>と</u> |
| 171 | (2)                                                   | (2)                        |
| 172 | and let themselves be bullied                         | いじめてくると                    |
| 173 | if that happens (.) <um> even if they have            | こうするとですね(.)<えーと> 責任もあっても   |

|     |                                                |               |
|-----|------------------------------------------------|---------------|
| 174 | responsibility they have no power (.)          | 権勢がない (.)     |
| 175 | the management's leadership and power will (.) | 幹部の主導せ権勢は (.) |
| 176 | <um>                                           | <えーと>         |
| 177 | (2)                                            | (2)           |
| 178 | no longer be at 100%                           | 100%となくなります   |

**6b.**

|     |                                                      |                               |
|-----|------------------------------------------------------|-------------------------------|
| 179 | D: I don't really get it (.) that (.) something is   | よくわかんない(.)それ(.)あのなんか          |
| 180 | wrong I think↑ (.) the translation                   | 間違ってるね ↑ (.)訳                 |
| 181 | E: the translation is (.) there were mistakes↑       | 翻訳が(.)間違いあったんですよ ↑            |
| 182 | there are spelling mistakes                          | スペルが間違ってた                     |
| 183 | D: yeah that's probably it (.) Mr ((founder's name)) | 多分それ(.)それはね((founder))さんがそういう |
| 184 | <u>wouldn't say</u> something like that=             | ことは <u>言わない</u> し=            |
| 185 | E: = he wouldn't                                     | = 言わないですね                     |
| 186 | D: something is <u>wrong</u> here                    | ちょっと <u>違う</u> ねこれは           |
| 187 | E: the translation is a bit wrong                    | 翻訳はちょっとそれなんか                  |



188 D: that's (.) written wrongly

ちょっと間違ったの(.)書いてありますね

### Extract seven

203 E: subordinates don't necessarily have to

部下はですね上司の言うことを

204 absolutely obey the words of their boss

絶対に服従しないといけないという

205 as you see it then

考えはないですね

206 (2)

(2)

207 E: the book interprets it like that (.) the book says

講書でそうだったんですよ(.)講書では

208 it goes top-down (.) yes (.) absolutely

トップダウンって (.) うん (.) 絶対的って

209 D: okay so (.) um about that ↑ (.) the idea that what your

あのね (.) まーそれがね ↑ (.) あの上司の言う

210 boss tells you is absolute isn't just for

ことは絶対だというのはこれは日本人だけでなく

211 Japanese people (.) anywhere (.) it's standard

て (.) どこでも (.) 基本的なそう

212 E: at the moment in the West I think at business

いま欧米ではですねたぶんビジネススクールと

213 schools they teach students to <um> challenge

かではやっぱり<あの>チャレンジ

214 even their superiors (.) <um like>

上司も(.)<まーなんか>

215 it seems like that's the case=

あるみたいですね=

- 216 D: =yes but challenging is different from =うんでもチャレンジということって別に
- 217 disobeying the boss right↑ 上司逆らうことじゃないでしょ↑
- 218 E: <no um I suppose> <いやあのそうですね>
- 219 but voicing a dissenting opinion= あの反対意見をいう=
- 220 D: =but voicing a dissenting opinion does not =いや反対意見をいうのは
- 221 necessarily mean (.) not obeying your boss right↑ 別に(.)上司に服従しないということないでしょ↑
